1 HSP90 inhibitors disrupt a transient HSP90-HSF1 interaction and identify a noncanonical model  
2 of HSP90-mediated HSF1 regulation

3 Toshiki Kijima<sup>1,\*</sup>, Thomas L. Prince<sup>1,2,\*,#</sup>, Megan L. Tigue<sup>1,\*</sup>, Kendrick H. Yim<sup>1</sup>, Harvey  
4 Schwartz<sup>1</sup>, Kristin Beebe<sup>1</sup>, Sunmin Lee<sup>3</sup>, Marek A. Budzynski<sup>4</sup>, Heinric Williams<sup>2</sup>, Jane B.  
5 Trepel<sup>3</sup>, Lea Sistonen<sup>4</sup>, Stuart Calderwood<sup>5</sup> and Len Neckers<sup>1,#</sup>

6 <sup>1</sup>Urologic Oncology Branch, Center for Cancer Research, National Cancer Institute, National  
7 Institutes of Health, Bethesda, MD 20892; <sup>2</sup>Urology Department, Geisinger Clinic, WCR 221,  
8 Danville, PA 17821; <sup>3</sup>Developmental Therapeutics Branch, Center for Cancer Research, National  
9 Cancer Institute, National Institutes of Health, Bethesda, MD 20892; <sup>4</sup> Faculty of Science and  
10 Engineering, Cell Biology, Åbo Akademi University, BioCity, Tykistökatu 6, Turku FIN-20520,  
11 Finland; <sup>5</sup>Radiation Oncology, Harvard Medical School, Beth Israel Deaconess Medical Center,  
12 330 Brookline Ave., Boston, MA 02215

13 \*These authors contributed equally to this work

14 #Corresponding authors: Thomas Prince, PhD and Len Neckers, PhD

15 LN: Urologic Oncology Branch, National Cancer Institute, Building 10/CRC, room 1-5940,  
16 9000 Rockville Pike, Bethesda, Maryland 20892; phone: 301-496-5899; fax: 301-402-0922;  
17 email: neckersl@mail.nih.gov

18 TP: Urology Department, Geisinger Clinic, WCR 221; Danville, PA 17821; phone: 570-271-  
19 6677; email: tprince@geisinger.edu

20

21 Running title: HSP90 inhibitors disrupt HSP90-HSF1 interaction

22 Keywords: Heat shock factor 1, Heat shock protein 90, Heat shock protein 70

1 **Abstract**

2 Heat shock factor 1 (HSF1) initiates a broad transcriptional response to proteotoxic stress while  
3 also mediating a cancer-specific transcriptional program. HSF1 is thought to be regulated by  
4 molecular chaperones, including Heat Shock Protein 90 (HSP90). HSP90 is proposed to  
5 sequester HSF1 in unstressed cells, but visualization of this interaction *in vivo* requires protein  
6 crosslinking. In this report, we show that HSP90 binding to HSF1 depends on HSP90  
7 conformation and is only readily visualized for the ATP-dependent, N-domain dimerized  
8 chaperone, a conformation only rarely sampled by mammalian HSP90. We have used this  
9 mutationally fixed conformation to map HSP90 binding sites on HSF1. Further, we show that  
10 ATP-competitive, N-domain targeted HSP90 inhibitors disrupt this interaction, resulting in the  
11 increased duration of HSF1 occupancy of the *hsp70* promoter and significant prolongation of  
12 both the constitutive and heat-induced HSF1 transcriptional activity. While our data do not  
13 support a role for HSP90 in sequestering HSF1 monomers to suppress HSF1 transcriptional  
14 activity, our findings do identify a noncanonical role for HSP90 in providing dynamic  
15 modulation of HSF1 activity by participating in removal of HSF1 trimers from heat shock  
16 elements in DNA, thus terminating the heat shock response.

17

18

## 1 **Introduction**

2 Heat shock factor 1 (HSF1) is an evolutionarily conserved transcription factor that initiates the  
3 cytoprotective heat shock response (HSR). Found throughout the eukaryotic kingdom, HSF1  
4 allows for the cellular adaptation to proteotoxic stress<sup>1</sup>. Through an incompletely defined  
5 mechanism, mammalian HSF1 monomers in cytosol are activated and form trimers, translocate  
6 into the nucleus, and bind sequences of DNA known as heat shock elements (HSE), ideally  
7 represented as nGAAnnTTCnnGAAn<sup>2 3</sup>. Throughout this process HSF1 is heavily post-  
8 translationally modified and interacts with numerous cellular components. The binding of HSF1  
9 trimers to HSE induces the transcription of a specialized set of genes known as molecular  
10 chaperones while also repressing the expression of other genes<sup>4 5</sup>, although the repressive effect  
11 of HSF1 is controversial<sup>6</sup>. Once expressed, these molecular chaperones (or Heat Shock Proteins,  
12 HSPs) act to stabilize the three-dimensional structure of numerous cellular proteins, thus helping  
13 to maintain cellular proteostasis. HSP90 and HSP70 are ATP-dependent HSPs that interact with  
14 a large sector of the eukaryotic proteome while also modulating HSF1 transcriptional activity<sup>7 8</sup>  
15<sup>9</sup>. The relationship between HSF1 and one or more components of the cellular proteostasis  
16 network is thought to represent a primary axis in the control of the HSR<sup>7 10</sup>.

17 In cancer, HSF1 enables malignant cell growth and is overexpressed in a number of tumor types  
18 associated with poor prognosis<sup>11 12 13</sup>. Although HSF1 does not initiate oncogenic  
19 transformation, tumors become addicted to HSF1 activity as their microenvironments become  
20 increasingly toxic and as they require higher levels of HSPs to maintain proteostasis<sup>14</sup>.

21 Moreover, many oncogenes that drive tumorigenesis are metastable and rely on HSPs to sustain  
22 their activity. This is particularly true for mutated or overexpressed kinases and transcription  
23 factors that interact with HSP90<sup>15</sup>. HSF1 also promotes a cancer-specific transcriptional  
24 program that supports malignancy through the expression of genes for proliferation, anabolic

1 metabolism, metastasis and apoptosis prevention. Comprised of over 500 genes, this cancer-  
2 specific HSF1 transcriptome is associated with poor clinical outcomes <sup>11</sup>.

3 The human *HSF1* gene is encoded on chromosome 8q24 by 14 exons that produce two splice  
4 variants. The largest variant, which is described in this report, is translated into 529 amino acids.  
5 HSF1 has a predicted molecular weight of 57 kDa, yet migrates at approximately 75 kDa on  
6 SDS-PAGE due to a large number of post-translational modifications (PTMs), including  
7 phosphorylation, acetylation and sumoylation <sup>16 17</sup>. The overall structure of HSF1 is mostly  
8 disordered except for the evolutionarily conserved N-terminal DNA-binding domain (DBD) that  
9 forms a winged helix-turn-helix structure <sup>18 19</sup>. The rest of HSF1 is predicted not to maintain a  
10 stable tertiary structure, a feature observed for many proteins involved in transcription and  
11 cellular regulation <sup>20</sup>. Following the DBD and a linker region is the set of heptad repeats (HR-  
12 A/B) that form the leucine zippers that allow for HSF1 trimerization <sup>21</sup>. Adjacent to the HR-A/B,  
13 the unstructured regulatory domain (RD) is the molecular region understood to be capable of  
14 sensing heat and initiating the HSR <sup>22</sup>. The RD contains numerous phosphorylation sites <sup>23</sup> and  
15 functions, along with a portion of HR-A/B, to repress the transcriptional activity of NF-IL6 <sup>24</sup>.  
16 Another heptad repeat (HR-C), C-terminal to the RD, is understood to sequester HR-A/B in an  
17 intramolecular interaction that suppresses spontaneous HSF1 trimerization <sup>21</sup>. Most recently,  
18 Hentze et al have shown that HSP90 $\beta$  interacts with the HR-C domain in solution to promote its  
19 temperature-sensitive dissociation from HR-A/B, thus reducing the temperature at which HSF1  
20 is able to trimerize <sup>25</sup>. The C-terminal transactivation domain (TAD) is highly disordered and is  
21 required for robust HSF1 transcriptional activity in response to stress <sup>26</sup>. The TAD is also a site  
22 of HSP70 binding, which negatively regulates HSF1 transcriptional activity <sup>27</sup>.

23 While the interaction of HSP70 with HSF1 in unstressed cells is readily observed by co-  
24 immunoprecipitation <sup>27</sup>, interaction of endogenous HSP90 and HSF1 is not readily detectable  
25 and requires cross-linking to stabilize the association <sup>7</sup>. These data argue against a frequently

1 cited model postulating sequestration of HSF1 monomers by HSP90 under non-stress conditions  
2 (7), but they would support such a role for HSP70, as has recently been proposed in yeast <sup>28</sup>.  
3 Chaperone binding to HSF1 monomers is thought to prevent spontaneous trimerization. In such  
4 a model, HSF1 is released from chaperone suppression and allowed to trimerize when cells  
5 experience severe proteotoxic stress that generates a large population of denatured client proteins  
6 and an increased demand for chaperones <sup>29</sup>. Other studies have shown that HSP90 can also bind  
7 the trimerized DNA-bound state of HSF1 and that this interaction attenuates HSF1  
8 transcriptional activity <sup>8</sup>. Thus, HSP90 has variously been proposed to function as a sensor,  
9 repressor and/or attenuator of the HSR.

10 Determining the mechanism by which HSP90 affects the HSR is of medical significance.  
11 Currently, HSP90 is the only HSP whose targeting by small molecules has been extensively  
12 evaluated in the clinic as a strategy to treat cancer <sup>30</sup>. However, although HSP90 inhibitors have  
13 shown great promise in pre-clinical studies due to their ability to disrupt proteostasis and to  
14 promote the degradation of oncogenic kinases and other pro-growth components <sup>31</sup>, their single  
15 agent activity in patients has not been impressive <sup>32 33</sup>. This discrepancy has been ascribed, in  
16 part, to the observation that ATP-competitive HSP90 inhibitors promote the HSR and result in  
17 the increased expression of HSP70, HSP27, and other pro-survival components <sup>34 35</sup>, possibly  
18 offsetting any anti-cancer benefit of these drugs. Moreover, HSP90 inhibitors may enhance the  
19 recently identified cancer-specific HSF1 transcriptional program <sup>11</sup>. How this is mechanistically  
20 achieved in the absence of robust HSP90/HSF1 interaction has remained obscure.

21 In this report, we define the interactions of HSF1 with both nuclear-cytosolic paralogs of HSP90,  
22 stress-inducible HSP90 $\alpha$  and constitutively expressed HSP90 $\beta$ , and with endogenous HSP70.  
23 Remarkably, we readily observed interaction of HSF1 with mutant HSP90 trapped in an ATP-  
24 dependent “closed” conformation (unable to hydrolyze ATP), and we found this interaction to be  
25 disrupted by N-terminal HSP90 inhibitors that are currently being clinically evaluated. To

1 determine the domains in HSF1 that bind HSP90 and HSP70 we made a series of HSF1 deletion  
2 mutants and analyzed their interactions by immunoprecipitation-western blot. We observed that  
3 the binding of HSP90 $\alpha$ , HSP90 $\beta$  and HSP70 uniquely map across HSF1. This was  
4 complemented by analysis of the effects of these deletion constructs on HSF1 trimerization and  
5 HSR reporter activity. Finally, we found that HSP90 inhibitors disrupt association of “closed”  
6 HSP90 proteins with HSF1, while concomitantly increasing the duration of HSF1 binding to  
7 *hsp70* promoter and extending the duration of heat-induced HSF1 transcriptional activity. While  
8 our data do not support a role for HSP90 in sequestering HSF1 monomers, our findings reveal  
9 that HSP90 inhibitors interfere with a noncanonical role for HSP90 in providing dynamic  
10 modulation of HSF1 activity by removing HSF1 trimers from heat shock elements in DNA.

## 11 **Results**

### 12 **Wild type HSF1 readily interacts with N-domain dimerized (“closed” conformation)**

#### 13 **HSP90**

14 Previous studies have suggested that the intracellular interaction of HSF1 and HSP90 is weak  
15 and transient, and requires chemical crosslinking for visualization <sup>7</sup>. We showed recently that the  
16 strength of this interaction may be influenced by HSP90 conformation <sup>36</sup>. Binding of ATP to N-  
17 terminal domains of HSP90 promotes their transient dimerization and induces a “closed”  
18 conformation that is poised for ATP hydrolysis. ATP binding and hydrolysis, in turn, drive the  
19 structural rearrangements in HSP90 that support chaperone function. Upon release of ADP, or in  
20 the presence of ATP-competitive HSP90 inhibitors, HSP90 N-domains revert to an undimerized  
21 state (“open” conformation) (Figure 1A).

22 Mutation of key residues within the N-terminal domain of HSP90 stabilize either the “closed”  
23 (HSP90 $\alpha$  E47A, HSP90 $\beta$  E42A; allow ATP binding but prevent hydrolysis) or “open” (HSP90 $\alpha$   
24 D93A, HSP90 $\beta$  D88A; prevent ATP binding) conformations. We co-transfected HEK293 cells

1 with plasmids encoding FLAG-tagged wild type or conformationally restricted HSP90 proteins  
2 together with wild type HA-HSF1, harvested the cells the following day, and observed the  
3 protein-protein interactions by anti-FLAG immunoprecipitation-western blot (IP-WB) analysis  
4 (Figure 1B, C). The relative expression of HSF1 in transfected and untransfected cells is shown  
5 in Supplemental Figure 1A. We found that wild type HSF1 strongly interacts, without the need  
6 for crosslinking, with both “closed” HSP90 mutants but not with the pair of “open” HSP90  
7 mutants. Importantly, the results with transfected HSF1 were confirmed by co-  
8 immunoprecipitation of “closed” HSP90 with endogenous HSF1 in HEK293 cells (Supplemental  
9 Figure 1B). As previously reported <sup>7</sup>, interaction of wild type HSP90, which samples all  
10 available conformational states, with full-length HSF1 is not detectable in the absence of protein  
11 crosslinking. This result is consistent with the observation that human HSP90, in contrast to the  
12 yeast chaperone, is most likely to be found in the “open” conformation, even when ATP is bound  
13 <sup>37</sup>. Moreover, we observed that HSP90 $\alpha$  E47A bound more avidly to HSF1 than did HSP90 $\beta$   
14 E42A, suggesting that the stress-inducible HSP90 $\alpha$  isoform may be a stronger negative regulator  
15 of HSF1 activity compared to the constitutively expressed HSP90 $\beta$  isoform, as previously  
16 proposed <sup>36</sup>.

17 To further assess the interaction between wild type HSF1 and the “closed” HSP90 mutants, we  
18 repeated the reciprocal experiment in the absence or presence of the anion molybdate (MoO<sub>4</sub>)  
19 Molybdate has been reported to stabilize a high affinity client binding state of HSP90 <sup>38</sup>. Target  
20 proteins were pulled down via either FLAG-HSP90 or FLAG-HSF1 (Figure 1C). Although, the  
21 HSF1/ “closed” HSP90 interaction was confirmed, molybdate only moderately increased the  
22 interaction of the “closed” HSP90 mutants with no discernable effect on interaction of wild type  
23 HSP90 with HSF1, indicating that HSP90 interacts with HSF1 in a manner that is likely unique  
24 when compared to other clients such as protein kinases <sup>38 39</sup>.

1 Administration of HSP90 inhibitors often results in apparent induction or augmentation of the  
2 HSR. Currently, there are two general classes of inhibitors. The more clinically advanced N-  
3 terminal inhibitors competitively bind to the ATP pocket and prevent or disrupt nucleotide-  
4 dependent N-domain dimerization<sup>40</sup>. These inhibitors include 17AAG (tanespimycin), STA9090  
5 (ganetespib) and SNX2112, among others<sup>30</sup>. A second class of inhibitors, based on the antibiotic  
6 novobiocin, binds a putative nucleotide-binding domain in the C-terminal portion of HSP90  
7 (adjacent to the C-terminal dimerization domain) and inhibits the chaperone in a distinct manner  
8<sup>41</sup>. The synthetic novobiocin derivative KU32 is representative of this class of inhibitors<sup>42</sup>. To  
9 explore how N- and C-terminal inhibitors might affect HSF1/HSP90 interaction, we co-  
10 transfected HEK293 cells with wild type HA-HSF1 and FLAG-HSP90 $\alpha$  E47A, briefly treated  
11 cells with inhibitors the following day, harvested and analyzed protein-protein interactions by IP-  
12 WB (Figure 1D, Supplemental Figure 1C). Each of the three N-terminal inhibitors disrupted the  
13 interaction between HSF1 and HSP90 $\alpha$  E47A, consistent with their disruption of N-domain  
14 dimerization. In contrast, KU32 did not disrupt the interaction between HSF1 and “closed”  
15 HSP90, indicating that this is a unique property of ATP-competitive, N-terminal HSP90  
16 inhibitors.

### 17 **Mapping of HSP90 and HSP70 interactions across HSF1**

18 To investigate the interactions of HSP90 and HSP70 with HSF1 in the absence of a crosslinking  
19 agent, we constructed and transiently expressed in HEK293 cells a series of HSF1 truncation and  
20 internal deletion mutants, and we analyzed them for chaperone interaction by IP-WB (Figure 2A  
21 and B). Of note, N195, an N-terminal truncation mutant lacking the DBD and most of the HR-  
22 A/B domain, expressed very poorly (see blot in Figure 2B) and data obtained using this mutant  
23 should be considered in this context. These HSF1 constructs were used to initially query the  
24 interaction of HSP90 and HSP70 across the TAD, HR-C, RD, HR-A/B and DBD domains of  
25 HSF1 (Supplemental Figure 2A, B).



1 Based on these preliminary data obtained with the closed HSP90 mutants, a subpanel of HSF1  
2 truncation and deletion mutants were selected to assess association of HSP90 $\alpha$  E47A.  
3 Pulldowns were repeated in triplicate, resulting blots were subjected to densitometry to generate  
4 mean values +/- standard deviations and p values to assess significance (compared to association  
5 of HSP90 $\alpha$  E47A with full length HSF1) were obtained. These data are shown in Figure 2,  
6 panels C and D. Analysis of HSF1 C-terminal truncations revealed a distinct interaction motif for  
7 “closed” HSP90 E47A (Figure 2C). The “closed” mutant bound most intensely to HSF1  
8 proteins containing the HR-A/B domain and a portion of the heat-sensing RD, but lacking the  
9 HR-C and TAD. The clear difference in HSP90 interaction between the C442 and C383 HSF1  
10 truncation mutants suggests that presence of the HSF1 HR-C + TAD domain inhibits HSP90  
11 interaction. Although HSP90 E47A bound weakly to more extensive C-terminal truncations,  
12 binding was not significantly different from wild type HSF1. The dual importance of both the  
13 HR-A/B and RD domains for HSP90 binding is supported by the observation that neither the  
14 isolated HR-A/B domain (N120-C205, Figure 2D and Supplemental Figure 2B) nor the isolated  
15 RD domain (N262-C383, Supplemental Figure 2B) display binding to HSP90.  
16 Importantly, deletion of the HR-C domain dramatically improves the binding of both “closed”  
17 and endogenous HSP90, suggesting that HR-C intermolecular binding to HR-A/B (characteristic  
18 of inactive HSF1 monomers) interferes with HSP90 binding and providing further evidence that  
19 is inconsistent with a role for HSP90 in sequestering monomeric HSF1. Finally, the HSF1 HR-  
20 A/B internal deletion construct DEL142-169, where amino acids 142-169 were removed, bound  
21 “closed” HSP90 while the HR-A/B internal deletion construct DEL183-214 did not (Figure 2D  
22 and Supplemental Figure 2D), suggesting that the C-terminal half of the HR-A/B is necessary for  
23 HSP90 binding.  
24 While the binding pattern of endogenous HSP90 generally mirrors that of “closed” HSP90  
25 (although, in contrast to “closed” HSP90, detectable binding of endogenous HSP90 requires

1 deletion of the HR-C domain, see Supplemental Figure 2A, B), endogenous HSP90 also uniquely  
2 binds the HSF1 constructs N195 and N262 but not the equivalent HSF1 mutants lacking the HR-  
3 C and TAD domains (N195-C383 or N262-C383, see Supplemental Figure 2B). These findings  
4 are consistent with the interaction of endogenous HSP90 (primarily existing in an N-domain  
5 undimerized conformation) with the HR-C domain, as recently reported by Mayer and  
6 colleagues for HSP90 $\beta$ . Importantly, these authors demonstrated that HSP90 binding to the  
7 HSF1 HR-C domain promotes its temperature-sensitive dissociation from HR-A/B, thus  
8 facilitating HSF1 trimerization<sup>25</sup>. Like our data, these findings are also not consistent with a role  
9 for HSP90 in suppressing HSF1 trimerization.

10 In contrast to the binding profile of HSP90, endogenous HSP70 interacts robustly with full-  
11 length HSF1 as well as with most of the C-terminal truncation and deletion mutants  
12 (Supplemental Figure 2A and B), with the exception of those mutants containing increasingly  
13 truncated RD. Endogenous HSP70 also bound poorly to N120-C205 (isolated HR-A/B domain)  
14 despite ample expression of this HSF1 protein fragment. Taken together, these data identify the  
15 RD as being sufficient for HSP70 binding in unstressed cells, although HSP70 binding to other  
16 domains of HSF1 has also been reported<sup>26 27</sup>.

17 To further compare the role of the HR-A/B domain in HSF1 trimerization and in HSP90  
18 interaction, we made a set of alanine scanning mutants (145A<sub>4</sub>, 151A<sub>5</sub>, 161A<sub>5</sub>) between amino  
19 acids 142-169 (see Methods) and compared them in the experiments below with the internal  
20 deletion constructs DEL142-169 and DEL183-214. Using IP-WB analysis of co-transfected WT  
21 HA-HSF1 and mutant FLAG-HSF1, we observed that the HR-A/B domain alanine mutants did  
22 not disrupt HSF1 intermolecular interaction, in distinct contrast to the HR-A/B deletion mutants  
23 DEL142-169 and DEL182-214 (Supplemental Figure 2C). In contrast, these alanine mutants  
24 bound “closed” HSP90 $\alpha$  E47A to a greater extent compared to WT HSF1 (but similarly to  
25 DEL142-169 (Supplemental Figure 2D and Figure 2D). These data are consistent with the

1 hypothesis that the HR-A/B region contributing to HSF1 trimerization is distinct from the HR-  
2 A/B region that is required for HSP90 binding. Further, our findings emphasize that the presence  
3 or absence of HSP90 binding has no impact on HSF1 trimerization (see Figure 3B, D and  
4 Supplemental Figure 5). Finally, the enhanced HSP90 binding of the HSF1 truncation and  
5 deletion mutants shown in Figure 2C, D does not involve possible heterotrimerization of the  
6 transfected HSF1 constructs with endogenous HSF1, as similar results are obtained when the  
7 HSF1 truncation mutants are transfected into HEK293 cells stably knocked down for  
8 endogenous HSF1 (Supplemental Figure 2E).

9 **The TAD and DBD are essential for HSF1 transcriptional activity while the HR-A/B**  
10 **domain is required for dominant negative activity of truncated HSF1**

11 To further explore potential relationships between the ability of HSF1 to (1) form intermolecular  
12 trimers, (2) activate transcription, and (3) interact with HSP90, we examined the impact of HSF1  
13 N/C-truncations and internal deletions on *hsp70* promoter-reporter activity as a readout of the  
14 HSR, and we complemented these observations with IP-WB analysis of HSF1 trimerization and  
15 HSF1-HSP90 interaction. Overexpression of WT HSF1 increased *hsp70*-reporter activity in  
16 response to heat shock by nearly 2-fold above a pcDNA control. Brief pretreatment of cells with  
17 17AAG prior to heat shock increased *hsp70*-reporter activity in pcDNA control by 3.5-fold  
18 compared to heat shock alone, and a similar fold increase in reporter activity was observed upon  
19 17AAG exposure prior to heat shock in cells transfected with WT HSF1 (Figure 3A). For  
20 reference, reporter activity in response to 17AAG alone, compared to heat shock and heat shock  
21 + 17AAG is shown in Supplemental Figure 3A. Both heat-induced and 17AAG + heat-induced  
22 *hsp70*-reporter activity were progressively impacted by increasing truncation of the TAD (C-  
23 terminal deletion constructs C509, C477 and C442), consistent with the importance of this  
24 domain in modulating HSF1 activation<sup>43</sup>. Complete removal of TAD, HR-C and RD domains  
25 (constructs C383 through C205) fully repressed *hsp70*-reporter activity even with 17AAG

1 pretreatment, suggesting that the presence of the HR-A/B domain of these mutants is essential  
2 for dominant-negative activity, as a consequence of disrupting endogenous HSF1 trimers. Indeed,  
3 truncation through the C-terminal portion of the HR-A/B domain (C182) restored *hsp70*-reporter  
4 response to that seen after treating pcDNA control cells with heat and heat + 17AAG. Consistent  
5 with this result, HSF1 C182 is unable to form an intermolecular interaction with wild type HSF1,  
6 as are additional HR-A/B truncations (Figure 3D). Unexpectedly, further truncation (C167, C146  
7 and C129) through the HR-A/B, increased *hsp70*-reporter activity above that of the pcDNA  
8 control, suggesting the presence of a repressing motif located between amino acids 167 and 182  
9 of HSF1 (Figure 3A).

10 Our previous observation of HSP90 binding to a series of RD-containing C-terminal truncation  
11 mutants (C383, C339, C311, Figure 2C) suggested that HSP90 binding might be involved in  
12 repressing HSF1-driven *hsp70*-reporter activity. To address this possibility, we used IP-WB to  
13 investigate the effect of 17AAG on the interaction of HSP90 $\alpha$  E47A with these HSF1 RD  
14 truncation mutants since these mutants repressed *hsp70*-reporter activity even in the presence of  
15 17AAG (Figure 3A). Consistent with the data in Figure 2C, we observed increased binding of  
16 HSP90 $\alpha$  E47A to the RD truncation mutants C383, C339 and C311 when compared to wild type  
17 HSF1. However, upon addition of 17AAG, HSF1-HSP90 $\alpha$  E47A interaction was fully disrupted  
18 (Figure 3B), while *hsp70*-reporter activity remained repressed (Figure 3A). These data indicate  
19 that robust HSP90 interaction with HSF1 is not responsible for the dominant negative activity of  
20 these mutants. Consistent with this hypothesis, the RD truncation mutant C287 bound poorly to  
21 HSP90 $\alpha$  E47A, yet displayed dominant negative activity (see Figures 3A and B). Taken together,  
22 our findings support the hypothesis that the dominant negative activity of HSF1 C-terminal  
23 truncations retaining an intact HR-A/B domain is due to disruption of endogenous full length  
24 HSF1 trimers necessary for transcriptional activity.

1 Next, we assessed the effects of another set of HSF1 N/C-terminal deletion constructs on *hsp70*-  
2 reporter activity (Figure 3C). Here we observed that the deletion constructs N120, N120-C383,  
3 N120-C325 and N120-C287, all lacking the DBD but including an intact HR-A/B domain,  
4 repressed *hsp70*-reporter activity below the level seen with empty plasmid, consistent with  
5 dominant negative inhibition of endogenous HSF1. Removal of the HR-A/B domain (N195,  
6 N262) relieved this repression to some extent, even when the TAD and RD were removed  
7 (N195-C383, N195-C325, N262-C383, N262-C325). Finally, the internal HR-A/B deletion  
8 mutants DEL142-169 and DEL182-214 supported *hsp70*-reporter activity at a level similar to  
9 that of empty plasmid, confirming that an intact HR-A/B domain is required for dominant  
10 negative activity. The statistical significance of the changes in reporter activity can be found in  
11 Supplemental Figure 3B. Of note, these data are in contrast to the impact of these two HR-A/B  
12 internal deletions on HSP90 binding (Figure 2D, right two lanes).

13 To profile the ability of these deletion constructs to affect HSF1 intermolecular interaction  
14 (indicative of trimerization capability), we analyzed by IP-WB the interaction of co-transfected  
15 wild type HA-HSF1 with various FLAG-HSF1 deletion mutants. We found that FLAG-tagged  
16 deletion mutants (C383, C287, C233, C205 and N120) that dominant negatively repressed  
17 *hsp70*-reporter activity interacted efficiently (equivalent or enhanced interaction compared to  
18 FLAG-tagged wild type HSF1) with wild type HA-HSF1. In contrast, deletion mutants (C182,  
19 C167, C146, C129, DEL142-169, DEL183-214) that did not strongly repress *hsp70*-reporter  
20 activity did not interact with WT HA-HSF1 (Figure 3D). We excluded N195 from this analysis  
21 due to its poor expression as shown in Figures 2B and 3D. Likewise, the dominant negative  
22 HSF1 mutants N120, N120-C383, N120-C325 and N120-C287 strongly interacted with full  
23 length HSF1, while N195-C383 (which showed no dominant negative activity) did not  
24 (Supplemental Figure 3C and D). Combined with our previous observations, these data further  
25 confirm that HSF1 mutant-mediated dominant negative repression of endogenous HSF1-driven

1 transcription depends on the ability to form an intermolecular interaction with wild type HSF1.

2 A cartoon summarizing these data is provided in Figure 3E.

3 **Impact of RD phosphorylation state on HSP90 inhibitor effect on HSF1 activity and**  
4 **mobility shift in SDS-PAGE, and on HSF1 interaction with HSP90**

5 Stress-inducible phosphorylation of the HSF1 RD coincides with acquisition of transactivation  
6 capacity, although a functional requirement of RD phosphorylation for HSF1 activation has not  
7 been demonstrated. Indeed, a recent report dissociates RD phosphorylation from HSF1 activation  
8 and suggests that RD phosphorylation may serve as a rheostat to modulate the degree of  
9 activation<sup>23</sup>. Since N-terminally targeted HSP90 inhibitors also cause a distinct,  
10 phosphorylation-dependent mobility shift of HSF1 coincident with disrupting its association with  
11 conformationally restricted HSP90 proteins (see Figure 1D, Supplemental Figure 1C and  
12 Supplemental Figure 4), we wished to determine whether these drugs promoted phosphorylation  
13 of sites only within the RD and whether RD phosphorylation was a prerequisite for HSP90  
14 inhibitor-enhanced HSF1 activity. For this purpose, we used the delta PRD (dPRD) HSF1  
15 construct previously described, in which all phosphorylation sites within the RD have been  
16 mutated to alanine (see Figure 4A)<sup>23</sup>. Using the *hsp70*-reporter assay, we confirmed that dPRD  
17 HSF1 was more sensitive to heat shock, and to the combination of heat shock and 17AAG,  
18 compared to wild type HSF1 (Figure 4B). Unexpectedly, the mobility of HSF1 dPRD was also  
19 shifted when challenged with three N-domain HSP90 inhibitors (Figure 4C), strongly suggesting  
20 that HSP90 inhibitor-induced HSF1 phosphorylation is not restricted to site(s) within the RD  
21 (Supplemental Figure 4). Importantly, lack of phosphorylation within the RD domain does not  
22 affect trimerization of either full length HSF1 or the various HSF1 deletion mutants discussed  
23 above (Supplemental Figure 3E).

24 **HSP90 inhibition increases duration of HSF1 binding to *hsp70* promoter and prolongs**  
25 **duration of HSF1 transcriptional activity in response to heat shock**

1 To assess the outcome of combining HSP90 inhibition with heat shock compared to either  
2 inhibitor or heat shock alone, we monitored the extent and duration of HSF1 occupancy of the  
3 *hsp70* promoter by chromatin immunoprecipitation (ChIP) with antibody to HSF1. HEK293 cells  
4 were pretreated for 1 hour at 37°C with 10 μM 17AAG or left untreated, and then exposed to  
5 heat shock (42°C for 30 minutes). After recovery for varying times at 37°C (no recovery, 2 hours,  
6 4 hours, 6 hours), HSF1 ChIP was performed and pulldown of associated *hsp70* promoter  
7 sequences was assessed by PCR. An additional group exposed to 17AAG but in the absence of  
8 heat shock was also subjected to ChIP analysis at the indicated times (based on recovery time  
9 after heat shock). The top panel in Figure 5A shows a representative experiment in which the  
10 expected PCR fragments were run on an agarose gel. In the bottom panel, PCR data reflecting  
11 the extent and duration of HSF1 occupancy of the *hsp70* promoter were quantified by  
12 densitometry (3 independent experiments +/- standard deviation), normalized to input and  
13 graphed as shown (Figure 5A, values obtained in the absence of both heat shock and 17AAG  
14 pretreatment were arbitrarily set to 1). In the absence of 17AAG, HSF1 binding to the *hsp70*  
15 promoter was highest immediately after heat shock (no recovery). Promoter occupancy declined  
16 below baseline by 2 hours and remained below baseline for the duration of the experiment. In  
17 contrast, 1-hour pre-exposure of cells to 17AAG prior to heat shock resulted in an increased  
18 duration of HSF1 binding to the *hsp70* promoter (significantly above baseline at 2 hours of  
19 recovery and significantly above the heat shock only value at later time points). Importantly, the  
20 17AAG alone samples displayed the same maximal level of HSF1 binding to *hsp70* promoter as  
21 did both the heat shock alone samples and the heat shock + 17AAG samples. However, in  
22 contrast to cells treated with heat shock alone, HSF1 promoter occupancy did not decline as  
23 rapidly in cells treated with 17AAG alone or in combination with heat shock. Thus, the level of  
24 HSF1 binding to DNA in these groups remained significantly above heat shock only values for  
25 the full 6-hour recovery period (at least 4 hours longer than after exposure to heat shock alone).

1 Additionally, we assessed HSF1 transcriptional activity in HEK293 cells after heat shock alone,  
2 17AAG alone, or after pre-exposure to 17AAG followed by heat shock, using the same  
3 experimental conditions as for the CHIP analysis above (Figure 5B). For this purpose, we  
4 examined endogenous *HSP70* gene expression by RT-qPCR. Similar to the impact of heat shock  
5 on HSF1 promoter occupancy, relative *HSP70* mRNA expression peaked after 2 hours of  
6 recovery from heat shock and declined thereafter to below baseline by 6 hours. In contrast,  
7 17AAG alone promoted a modest increase in *HSP70* mRNA (although below the peak seen after  
8 heat shock) that remained elevated at 2 and 6 hours. After combined 17AAG treatment and heat  
9 shock, *HSP70* mRNA level increased on par with exposure to heat shock alone (similar values at  
10 2 hours), but continued to increase to a peak value at 4 hours (25 % higher than the heat shock  
11 alone peak value) that was maintained at 6 hours. Importantly, the 4- and 6-hour increase in  
12 *HSP70* mRNA after combination treatment was significantly higher (2 – 2.5-fold) compared to  
13 HSP90 inhibitor alone.

## 14 **Discussion**

15 In this study, we assessed the importance of HSP90 conformation for binding to HSF1 and we  
16 found that only the ATP-dependent “closed” (e.g., N-domain dimerized) conformational mutants  
17 E47A (HSP90 $\alpha$ ) and E42A (HSP90 $\beta$ ) readily co-precipitate full-length HSF1, with HSP90 $\alpha$   
18 displaying the stronger interaction. As HSP90 $\alpha$  is stress-inducible and transcriptionally regulated  
19 by HSF1, this provides an appealing feedback control mechanism to attenuate the HSR,  
20 consistent with a model first proposed nearly twenty years ago<sup>8 44</sup>. Indeed, our previous finding  
21 that transient over-expression of HSP90 $\alpha$  reduced HSF1 transcriptional activity supports this  
22 possibility<sup>36</sup>. In the absence of these conformationally restrictive mutations, mammalian HSP90  
23 only rarely and transiently occupies the “closed” conformation, even in the presence of ATP,  
24 with the bulk of the protein at steady-state occupying an N-domain undimerized conformation<sup>37</sup>.



1 This is inconsistent with a role for HSP90 in binding to and sequestering HSF1 monomers to  
2 prevent trimerization, as has also been proposed <sup>7</sup>.

3 To identify chaperone binding sites in HSF1, we used a series of Flag-tagged HSF1 truncation  
4 and internal deletion mutants to interrogate binding of HSP90 and HSP70, including the binding  
5 of transiently expressed HSP90 $\alpha$ E47A or HSP90 $\beta$  E42A. Using this approach, we identified a  
6 region in HSF1 that associates most strongly with “closed” HSP90 (Supplemental Figure 5). This  
7 motif is comprised of the HR-A/B trimerization domain in the context of a portion of the RD.  
8 Binding of “closed” HSP90 to this motif is dramatically enhanced upon deletion of the HSF1  
9 HR-C and TAD domains. Since the HR-C domain interacts with the HR-A/B domain to retard  
10 HSF1 trimerization under basal conditions, these data are consistent with the preferential binding  
11 of “closed” HSP90 to HSF1 trimers. Residues in the C-terminal half of the HR-A/B domain  
12 (amino acids 183-214) are necessary and sufficient for binding. Of note, while endogenous  
13 HSP90 shares the HR-A/B + RD binding motif, visualization of endogenous HSP90 binding  
14 requires deletion of HR-C and TAD domains, very likely due to the weaker affinity of  
15 endogenous HSP90 (primarily existing in an “open” conformation) for client interactors. Taken  
16 together, these findings are not consistent with a role for HSP90 in repressing HSF1  
17 trimerization.

18 In contrast to HSP90, endogenous HSP70 binds to the isolated RD as well as other domains in  
19 HSF1. Only the isolated HR-A/B and DBD domains display weak interaction with HSP70.  
20 These data build upon earlier work by Shi et al demonstrating repression of HSF1 transcriptional  
21 activity as a consequence of HSP70 binding to the TAD <sup>26,27</sup>. Our observation that HSP70 also  
22 binds to the stress sensing RD may be relevant to the recent proposal that HSP70 provides an  
23 on/off switch for dynamic regulation of stress-induced HSF1 activation in yeast <sup>28</sup>. Whether  
24 HSP70 plays a similar role in regulating HSF1 activation in mammalian cells remains to be  
25 explored.

1 We used these HSF1 truncation and deletion mutants to identify the HR-A/B domain as  
2 necessary for dominant negative activity of HSF1 mutants lacking the TAD or the DBD.  
3 Importantly, and consistent with our model, we found that HSP90 binding to the HR-A/B is not  
4 required for dominant-negative activity as it is not reversed by 17AAG. Instead, dominant-  
5 negative activity depends on the ability to form an intermolecular interaction with other HSF1  
6 monomers, suggesting that each monomer of an HSF1 trimer must be intact in order to attain  
7 optimal HSF1 transcriptional activity.

8 A panel of clinically evaluated N-terminal HSP90 inhibitors uniformly enhance HSF1  
9 phosphorylation coincident with dissociation of HSF1 from HSP90. One or more drug-sensitive  
10 phosphorylation sites must lie outside of the RD, as an HSF1 protein with all putative RD  
11 phosphorylation sites mutated to alanine (dPRD HSF1) still underwent a phosphorylation-  
12 dependent mobility shift upon HSP90 inhibitor treatment. We are currently exploring the  
13 relevance of this observation to the activity of both wild type and dPRD HSF1, as well as the  
14 mechanistic impact of HSP90 inhibitor-mediated HSF1 phosphorylation on its transcriptional  
15 activity.

16 HSP90 ATP-competitive N-terminal inhibitors efficiently dissociate HSF1 from HSP90 “closed”  
17 mutants, likely as a consequence of ATP displacement and subsequent disruption of N-domain  
18 dimerization<sup>40</sup>. If ATP-bound, transiently N-domain dimerized HSP90 (including stress-  
19 inducible HSP90 $\alpha$ ) provides feedback control of the HSR by removing HSF1 trimers bound to  
20 heat shock promoter elements, HSP90 inhibition and subsequent dissociation from HSF1 would  
21 interfere with this process and would be predicted to prolong and/or intensify the HSR.  
22 Consistent with this model, HSF1-CHiP data show that HSP90 inhibition alone and in  
23 combination with a brief heat shock significantly enhanced the duration of HSF1 binding to  
24 *HSP70* promoter, compared to heat shock alone. When we assessed HSF1 transcriptional activity  
25 after these treatments (monitoring endogenous *HSP70* mRNA levels by RT-qPCR), we found

1 that pre-exposure to HSP90 inhibitor markedly enhanced the degree and significantly extended  
2 the duration of *HSP70* mRNA increase during recovery from a brief heat shock. HSP90  
3 inhibition alone caused a moderate increase in *HSP70* transcription, likely due to disruption of  
4 the dynamic regulation of constitutive HSF1 activity in transformed cells, a phenomenon  
5 recently described by Lindquist and colleagues<sup>11 12</sup>.

6 In summary, this report increases our understanding of the molecular mechanisms that regulate  
7 HSF1 and the unique contribution of molecular chaperones, including HSP90 and HSP70, to this  
8 process. While not precluding other possibilities, our findings are consistent with a role for  
9 HSP90 in attenuating the HSR in an ATP-dependent and conformation-specific manner, a  
10 process that is antagonized by ATP-competitive HSP90 inhibitors. A role for HSP90 in  
11 disassembling transcriptional regulatory complexes has been described previously<sup>45</sup>. Our data  
12 further suggest that, in contrast to HSP90, the readily observable interaction of endogenous  
13 HSP70 with HSF1, and our observation that the RD represents a major interaction motif for this  
14 chaperone, support the possibility that HSP70 may provide constitutive, stress-sensitive  
15 repression of the HSR in mammalian cells.

16

## 1 **Materials and Methods**

2 **Cell culture:** HEK293 cells (American Type Culture Collection) were maintained in DMEM  
3 supplemented with 10% FBS. Cells were grown in 6-well or 96-well plates to 50% confluency  
4 and then transfected for 16-24 hours with X-tremeGENE 9 transfection reagent (Roche)  
5 according to the provided protocol. HEK293 cells stably expressing an shRNA targeting HSF1  
6 was obtained from Dr. Chengkai Dai (Center for Cancer Research, NCI) and has been described  
7 previously <sup>46</sup>.

8 **Reagents:** 17AAG was obtained from the Developmental Therapeutics Program, NCI. STA9090  
9 (ganetespib) and SNX2112 were obtained from Synta Pharmaceuticals and Esanex, respectively.  
10 The C-terminal inhibitor KU32 was kindly provided by Dr. Brian Blagg (The University of  
11 Kansas, Lawrence, KS). MG132 and molybdate were purchased from Sigma-Aldrich. All drugs  
12 were used at 10  $\mu$ M for IP-WB or *hsp70*-reporter assays.

13 **Plasmids:** Sets of ATPase mutants of pcDNA-FLAG-HSP90 $\alpha/\beta$  and pcDNA-HA-HSP90 $\alpha/\beta$   
14 were made by the Quickchange method to alter designated amino acids. The series of C-terminal  
15 deletion constructs of pcDNA-FLAG-HSF1 were made by inserting a terminal stop codon into  
16 designated regions by the Quickchange method. The series of N-terminal deletion constructs of  
17 pcDNA-FLAG-HSF1 were made by ligating truncated HSF1 insert with pcDNA-FLAG  
18 backbone by Gibson assembly according to the provided protocol (New England Biolabs).

19 **Immunoprecipitation and western blotting:** Cells were lysed with TGNET buffer [50 mM Tris  
20 HCl pH7.5, 5% Glycerol, 100 mM NaCl, 2 mM EDTA, 0.5% Triton X-100] containing protease  
21 inhibitor cocktail and phosphatase inhibitor cocktail (Roche). Lysates were centrifuged at  
22 maximum speed for 15 minutes at 4°C. Supernatants were subjected to BCA protein assay for  
23 normalization, and then 40  $\mu$ g of protein were used as input lysate to confirm protein expression.  
24 From remaining lysates, 700  $\mu$ g of protein were subjected to immunoprecipitation by addition of

1 40  $\mu$ l of Anti-FLAG M2 affinity beads (Sigma-Aldrich, A2220) or HA affinity beads (clone HA-  
2 7, Sigma-Aldrich, A2095) followed by incubation with rotation for 2 hours at 4°C. After  
3 centrifugation, beads were washed 4 times with TGNET buffer. The proteins were then eluted  
4 with 30  $\mu$ l of 2X SDS sample buffer by boiling at 95°C for 5 minutes. Subsequently, samples  
5 were subjected to SDS-PAGE followed by western blotting. The following antibodies were used  
6 for western blot: HSF1 (Santa Cruz, sc-13516), HSP90 (Enzo Life Science, ADI-SPA-835),  
7 HSP70 (Enzo Life Sciences, ADI-SPA-810), HA (Rockland, 600-401-384), and FLAG (Sigma-  
8 Aldrich, A8592).

9 Additional Methods may be found in Supplemental Information. Materials and data generated in  
10 this study are available upon request.

## 1 **Acknowledgments**

2 This study was supported by funds from the Intramural Research Program, National Cancer  
3 Institute, Center for Cancer Research (L.N.). T.K was supported by a JSPS Research Fellowship  
4 for Japanese Biomedical and Behavioral Researchers at NIH. We dedicate this paper to the  
5 memory of Dr. Susan Lindquist, a friend and a pioneer in the study of molecular chaperones.

## 6 **Competing Interests**

7 None of the authors report competing financial interests with relevance to this work.

## 8 **Author Contributions**

9 T.K. designed experiments, performed experiments and helped write the paper; T.L.P. designed  
10 experiments, performed experiments, interpreted the data and helped write the paper; M.L.T.,  
11 K.H.Y., H.S., K.B. performed experiments and interpreted the data; S.L. and J.B.T. performed  
12 experiments, interpreted the data and helped write the paper; M.A.B. and L.S. provided reagents,  
13 interpreted data and helped write the paper; H.W. and S.C. interpreted data and helped write the  
14 paper; L.N. oversaw the whole project, devised experiments, interpreted data and wrote the paper.

## 15 **Data Availability**

16 Materials and data generated in this study are available upon request to the corresponding  
17 authors (T.L.P. and L.N.).

## 1   **References**

- 2   1     Vihervaara, A. & Sistonen, L. HSF1 at a glance. *Journal of cell science* **127**, 261-266,  
3     doi:10.1242/jcs.132605 (2014).
- 4   2     Sorger, P. K. & Pelham, H. R. Yeast heat shock factor is an essential DNA-binding  
5     protein that exhibits temperature-dependent phosphorylation. *Cell* **54**, 855-864 (1988).
- 6   3     Perisic, O., Xiao, H. & Lis, J. T. Stable binding of Drosophila heat shock factor to head-  
7     to-head and tail-to-tail repeats of a conserved 5 bp recognition unit. *Cell* **59**, 797-806  
8     (1989).
- 9   4     Trinklein, N. D., Chen, W. C., Kingston, R. E. & Myers, R. M. Transcriptional regulation  
10    and binding of heat shock factor 1 and heat shock factor 2 to 32 human heat shock genes  
11    during thermal stress and differentiation. *Cell stress & chaperones* **9**, 21-28 (2004).
- 12  5     Khaleque, M. A. *et al.* Heat shock factor 1 represses estrogen-dependent transcription  
13    through association with MTA1. *Oncogene* **27**, 1886-1893, doi:10.1038/sj.onc.1210834  
14    (2008).
- 15  6     Mahat, D. B., Salamanca, H. H., Duarte, F. M., Danko, C. G. & Lis, J. T. Mammalian  
16    Heat Shock Response and Mechanisms Underlying Its Genome-wide Transcriptional  
17    Regulation. *Molecular cell* **62**, 63-78, doi:10.1016/j.molcel.2016.02.025 (2016).
- 18  7     Zou, J., Guo, Y., Guettouche, T., Smith, D. F. & Voellmy, R. Repression of heat shock  
19    transcription factor HSF1 activation by HSP90 (HSP90 complex) that forms a stress-  
20    sensitive complex with HSF1. *Cell* **94**, 471-480 (1998).
- 21  8     Conde, R., Belak, Z. R., Nair, M., O'Carroll, R. F. & Ovsenek, N. Modulation of Hsf1  
22    activity by novobiocin and geldanamycin. *Biochemistry and cell biology = Biochimie et*  
23    *biologie cellulaire* **87**, 845-851, doi:10.1139/o09-049 (2009).
- 24  9     Karagoz, G. E. & Rudiger, S. G. Hsp90 interaction with clients. *Trends in biochemical*  
25    *sciences* **40**, 117-125, doi:10.1016/j.tibs.2014.12.002 (2015).
- 26  10    Neef, D. W. *et al.* A direct regulatory interaction between chaperonin TRiC and stress-  
27    responsive transcription factor HSF1. *Cell reports* **9**, 955-966,  
28    doi:10.1016/j.celrep.2014.09.056 (2014).
- 29  11    Mendillo, M. L. *et al.* HSF1 drives a transcriptional program distinct from heat shock to

- 1 support highly malignant human cancers. *Cell* **150**, 549-562,  
2 doi:10.1016/j.cell.2012.06.031 (2012).
- 3 12 Santagata, S. *et al.* High levels of nuclear heat-shock factor 1 (HSF1) are associated with  
4 poor prognosis in breast cancer. *Proceedings of the National Academy of Sciences of the*  
5 *United States of America* **108**, 18378-18383, doi:10.1073/pnas.1115031108 (2011).
- 6 13 Liao, Y. *et al.* Higher heat shock factor 1 expression in tumor stroma predicts poor  
7 prognosis in esophageal squamous cell carcinoma patients. *Journal of translational*  
8 *medicine* **13**, 338, doi:10.1186/s12967-015-0703-x (2015).
- 9 14 Dai, C., Whitesell, L., Rogers, A. B. & Lindquist, S. Heat shock factor 1 is a powerful  
10 multifaceted modifier of carcinogenesis. *Cell* **130**, 1005-1018,  
11 doi:10.1016/j.cell.2007.07.020 (2007).
- 12 15 Alarcon, S. V. *et al.* Tumor-intrinsic and tumor-extrinsic factors impacting hsp90-  
13 targeted therapy. *Current molecular medicine* **12**, 1125-1141 (2012).
- 14 16 Guettouche, T., Boellmann, F., Lane, W. S. & Voellmy, R. Analysis of phosphorylation of  
15 human heat shock factor 1 in cells experiencing a stress. *BMC biochemistry* **6**, 4,  
16 doi:10.1186/1471-2091-6-4 (2005).
- 17 17 Xu, Y. M., Huang, D. Y., Chiu, J. F. & Lau, A. T. Post-translational modification of  
18 human heat shock factors and their functions: a recent update by proteomic approach.  
19 *Journal of proteome research* **11**, 2625-2634, doi:10.1021/pr201151a (2012).
- 20 18 Littlefield, O. & Nelson, H. C. A new use for the 'wing' of the 'winged' helix-turn-helix  
21 motif in the HSF-DNA cocrystal. *Nature structural biology* **6**, 464-470, doi:10.1038/8269  
22 (1999).
- 23 19 Neudegger, T., Verghese, J., Hayer-Hartl, M., Hartl, F. U. & Bracher, A. Structure of  
24 human heat-shock transcription factor 1 in complex with DNA. *Nature structural &*  
25 *molecular biology* **23**, 140-146, doi:10.1038/nsmb.3149 (2016).
- 26 20 Schlessinger, A., Liu, J. & Rost, B. Natively unstructured loops differ from other loops.  
27 *PLoS computational biology* **3**, e140, doi:10.1371/journal.pcbi.0030140 (2007).
- 28 21 Rabindran, S. K., Haroun, R. I., Clos, J., Wisniewski, J. & Wu, C. Regulation of heat  
29 shock factor trimer formation: role of a conserved leucine zipper. *Science* **259**, 230-234  
30 (1993).



- 1 22 Newton, E. M., Knauf, U., Green, M. & Kingston, R. E. The regulatory domain of human  
2 heat shock factor 1 is sufficient to sense heat stress. *Molecular and cellular biology* **16**,  
3 839-846 (1996).
- 4 23 Budzynski, M. A., Puustinen, M. C., Joutsen, J. & Sistonen, L. Uncoupling Stress-  
5 Inducible Phosphorylation of Heat Shock Factor 1 from Its Activation. *Molecular and*  
6 *cellular biology* **35**, 2530-2540, doi:10.1128/MCB.00816-14 (2015).
- 7 24 Xie, Y., Chen, C., Stevenson, M. A., Auron, P. E. & Calderwood, S. K. Heat shock factor  
8 1 represses transcription of the IL-1beta gene through physical interaction with the  
9 nuclear factor of interleukin 6. *The Journal of biological chemistry* **277**, 11802-11810,  
10 doi:10.1074/jbc.M109296200 (2002).
- 11 25 Hentze, N., Le Breton, L., Wiesner, J., Kempf, G. & Mayer, M. P. Molecular mechanism  
12 of thermosensory function of human heat shock transcription factor Hsf1. *eLife* **5**,  
13 doi:10.7554/eLife.11576 (2016).
- 14 26 Shi, Y., Kroeger, P. E. & Morimoto, R. I. The carboxyl-terminal transactivation domain of  
15 heat shock factor 1 is negatively regulated and stress responsive. *Molecular and cellular*  
16 *biology* **15**, 4309-4318 (1995).
- 17 27 Shi, Y., Mosser, D. D. & Morimoto, R. I. Molecular chaperones as HSF1-specific  
18 transcriptional repressors. *Genes & development* **12**, 654-666 (1998).
- 19 28 Zheng, X. *et al.* Dynamic control of Hsf1 during heat shock by a chaperone switch and  
20 phosphorylation. *eLife* **5**, doi:10.7554/eLife.18638 (2016).
- 21 29 Gidalevitz, T., Prahlad, V. & Morimoto, R. I. The stress of protein misfolding: from  
22 single cells to multicellular organisms. *Cold Spring Harbor perspectives in biology* **3**,  
23 doi:10.1101/cshperspect.a009704 (2011).
- 24 30 Neckers, L. & Workman, P. Hsp90 molecular chaperone inhibitors: are we there yet?  
25 *Clinical cancer research : an official journal of the American Association for Cancer*  
26 *Research* **18**, 64-76, doi:10.1158/1078-0432.CCR-11-1000 (2012).
- 27 31 Trepel, J., Mollapour, M., Giaccone, G. & Neckers, L. Targeting the dynamic HSP90  
28 complex in cancer. *Nature reviews. Cancer* **10**, 537-549, doi:10.1038/nrc2887 (2010).
- 29 32 Barrott, J. J. & Haystead, T. A. Hsp90, an unlikely ally in the war on cancer. *The FEBS*  
30 *journal* **280**, 1381-1396, doi:10.1111/febs.12147 (2013).

- 1 33 Johnson, M. L. *et al.* Phase I/II Study of HSP90 Inhibitor AUY922 and Erlotinib for  
2 EGFR-Mutant Lung Cancer With Acquired Resistance to Epidermal Growth Factor  
3 Receptor Tyrosine Kinase Inhibitors. *Journal of clinical oncology : official journal of the*  
4 *American Society of Clinical Oncology* **33**, 1666-1673, doi:10.1200/JCO.2014.59.7328  
5 (2015).
- 6 34 Do, K. *et al.* Phase I study of the heat shock protein 90 (Hsp90) inhibitor onalespib  
7 (AT13387) administered on a daily for 2 consecutive days per week dosing schedule in  
8 patients with advanced solid tumors. *Investigational new drugs* **33**, 921-930,  
9 doi:10.1007/s10637-015-0255-1 (2015).
- 10 35 Shapiro, G. I. *et al.* First-in-human phase I dose escalation study of a second-generation  
11 non-ansamycin HSP90 inhibitor, AT13387, in patients with advanced solid tumors.  
12 *Clinical cancer research : an official journal of the American Association for Cancer*  
13 *Research* **21**, 87-97, doi:10.1158/1078-0432.CCR-14-0979 (2015).
- 14 36 Prince, T. L. *et al.* Client Proteins and Small Molecule Inhibitors Display Distinct  
15 Binding Preferences for Constitutive and Stress-Induced HSP90 Isoforms and Their  
16 Conformationally Restricted Mutants. *PloS one* **10**, e0141786,  
17 doi:10.1371/journal.pone.0141786 (2015).
- 18 37 Southworth, D. R. & Agard, D. A. Species-dependent ensembles of conserved  
19 conformational states define the Hsp90 chaperone ATPase cycle. *Molecular cell* **32**, 631-  
20 640, doi:10.1016/j.molcel.2008.10.024 (2008).
- 21 38 Hartson, S. D., Thulasiraman, V., Huang, W., Whitesell, L. & Matts, R. L. Molybdate  
22 inhibits hsp90, induces structural changes in its C-terminal domain, and alters its  
23 interactions with substrates. *Biochemistry* **38**, 3837-3849, doi:10.1021/bi983027s (1999).
- 24 39 Taipale, M. *et al.* Quantitative analysis of HSP90-client interactions reveals principles of  
25 substrate recognition. *Cell* **150**, 987-1001, doi:10.1016/j.cell.2012.06.047 (2012).
- 26 40 Beebe, K. *et al.* Posttranslational modification and conformational state of heat shock  
27 protein 90 differentially affect binding of chemically diverse small molecule inhibitors.  
28 *Oncotarget* **4**, 1065-1074, doi:10.18632/oncotarget.1099 (2013).
- 29 41 Donnelly, A. & Blagg, B. S. Novobiocin and additional inhibitors of the Hsp90 C-  
30 terminal nucleotide-binding pocket. *Current medicinal chemistry* **15**, 2702-2717 (2008).

- 1 42 Kusuma, B. R. *et al.* Synthesis and evaluation of novologues as C-terminal Hsp90  
2 inhibitors with cytoprotective activity against sensory neuron glucotoxicity. *Journal of*  
3 *medicinal chemistry* **55**, 5797-5812, doi:10.1021/jm300544c (2012).
- 4 43 Anckar, J. & Sistonen, L. Regulation of HSF1 function in the heat stress response:  
5 implications in aging and disease. *Annual review of biochemistry* **80**, 1089-1115,  
6 doi:10.1146/annurev-biochem-060809-095203 (2011).
- 7 44 Ali, A., Bharadwaj, S., O'Carroll, R. & Ovsenek, N. HSP90 interacts with and regulates  
8 the activity of heat shock factor 1 in *Xenopus* oocytes. *Molecular and cellular biology* **18**,  
9 4949-4960 (1998).
- 10 45 Freeman, B. C. & Yamamoto, K. R. Disassembly of transcriptional regulatory complexes  
11 by molecular chaperones. *Science* **296**, 2232-2235, doi:10.1126/science.1073051 (2002).
- 12 46 Tang, Z. *et al.* MEK guards proteome stability and inhibits tumor-suppressive  
13 amyloidogenesis via HSF1. *Cell* **160**, 729-744, doi:10.1016/j.cell.2015.01.028 (2015).  
14  
15

## 1 **Figure Legends**

### 2 **Figure 1. HSF1 is bound by HSP90 in the “closed” conformation**

3 A. HSP90 ATP-driven conformational cycle. HSP90 $\alpha$  E47A/HSP90 $\beta$  E42A mutants bind ATP  
4 but cannot hydrolyze it and remain trapped in the “closed” N-domain dimerized conformation.  
5 Conversely, HSP90 $\alpha$  D93A/HSP90 $\beta$  D88A mutants do not bind ATP and remain trapped in an  
6 “open” N-domain undimerized conformation.

7 B. HSF1 interaction with HSP90 “closed” and “open” mutants. HEK293 cells were co-  
8 transfected with HA-HSF1 and with each FLAG-HSP90 construct, harvested and analyzed for  
9 HSF1/HSP90 association by anti-FLAG IP - HSF1 WB. Pull-down experiments were repeated at  
10 least twice.

11 C. Reproducible and reciprocal HSF1 interaction with “closed” HSP90 $\alpha$  E47A and HSP90 $\beta$   
12 E42A mutants in the presence and absence of MoO<sub>4</sub>. Interactions were assessed by anti-FLAG  
13 (HSP90) IP - HSF1 WB (top panel) or anti-FLAG (HSF1) IP – HA (HSP90) WB (bottom panel).  
14 Pull-down experiments were repeated at least twice.

15 D. Effect of HSP90 inhibitors on HSF1-HSP90 $\alpha$  E47A interaction. HEK293 cells were  
16 transfected with HA-HSF1 along with FLAG-HSP90 $\alpha$  E47A, treated with N-terminal or C-  
17 terminal HSP90 inhibitors for 4 hours and analyzed by anti-FLAG (HSP90) IP- HSF1 WB. Pull  
18 down experiments were repeated at least twice.

19 Full blots used to create cropped figure panels are shown in Supplementary Figure 6.

20

### 21 **Figure 2: Mapping interaction sites of “closed” HSP90 on HSF1**

22 A. Schema of FLAG-HSF1 C-terminal truncation constructs and their expression in HEK293  
23 cells. The associated blot shows expression of each construct in HEK293 cells. Equal amounts of  
24 DNA were used for transfection. For construct C477, the upper band represents the intact  
25 truncation (designated by an asterisk), while the lower band is likely a proteolytic fragment.

26 B. Schema of FLAG-HSF1 N-terminal truncation and internal deletion constructs and their  
27 expression in HEK293 cells. The associated blot shows expression of each construct in HEK293  
28 cells. Equal amounts of DNA were used for each transfection. Note the poor expression of N195.  
29 For N195-C383, the lower band represents the intact construct (designated by an asterisk); the  
30 upper band may reflect a post translationally modified peptide.

1 C. Interaction of selected FLAG-HSF1 C-terminal truncation constructs with HA-tagged  
2 HSP90 $\alpha$  E47A. HEK293 cells were transfected with either FLAG-HSF1 constructs or FLAG-  
3 pcDNA control and HA-HSP90 $\alpha$  E47A, and then analyzed by anti-FLAG (HSF1) IP followed by  
4 HA (HSP90 $\alpha$  E47A) WB. Pull downs were performed in triplicate and western blots analyzed by  
5 densitometry. All HA IP bands were normalized to their respective FLAG IP signals (see  
6 Supplemental Figure 6, compilation of full blots) and then normalized to the WT signal. A one-  
7 way ANOVA utilizing multiple comparisons was performed to determine significant differences  
8 in HSP90 interaction between truncated HSF1 constructs and F-HSF1 WT. A representative blot  
9 is shown above the bar graph. Significance is indicated by asterisks (\*\* indicates  $p < 0.01$ ). The p-  
10 value for the difference between C339 and WT interaction was 0.0534.

11 D. Interaction of FLAG-HSF1 N-terminal truncation and internal deletion constructs with HA-  
12 tagged HSP90 $\alpha$  E47A: HEK293 cells were transfected and analyzed as in panel C. Significance  
13 is indicated by asterisks (\*\* indicates  $p < 0.01$  and \*\*\*\* indicates  $p < 0.0001$ ).

14 Full blots used to create cropped figure panels and for densitometry analysis for the bar graphs  
15 are  
16 shown in Supplementary Figure 6.

17

18 **Figure 3: Effects of HSF1 truncation and internal deletion mutants on *hsp70* promoter**  
19 **reporter activity and HSF1 dimerization.**

20 A. Expression of TAD-deleted HSF1 constructs inhibits endogenous HSF1 driven *hsp70*  
21 promoter-

22 reporter activity, while removal of the HR-A/B domain abrogates dominant negative activity.  
23 HEK293 cells were transfected with *hsp70* promoter-reporter construct and HSF1 C-terminal  
24 truncation constructs, treated with DMSO or 17AAG for 1 hour, heat shocked at 42 $^{\circ}$ C for 30  
25 minutes and allowed to recover for 4 hours before harvesting.

26 B. Disruption of HA-tagged HSP90 $\alpha$  E47A interaction with HSF1 C-terminal RD truncations by  
27 17AAG. HEK293 cells were transfected with HA-HSP90 $\alpha$  E47A and FLAG-HSF1 RD  
28 truncation mutants, then analyzed by anti-FLAG (HSF1) IP followed by HA (HSP90 $\alpha$  E47A)  
29 WB. Pull-down experiments were repeated at least twice.

30 C. Deletion of the DBD and retention of the HR-A/B domain inhibits *hsp70*-reporter activity

1 driven by endogenous HSF1. HEK293 cells were transfected, treated and processed as described  
2 in panel A.

3 D. Deletion of the HR-A/B domain disrupts HSF1 dimerization. HEK293 cells were transfected  
4 with WT HA-HSF1 and FLAG-HSF1 deletion constructs, then analyzed by anti-FLAG IP and  
5 HA WB. Pull-down experiments were repeated at least twice.

6 E. Summary of the effects of HSF1 domain deletions on *hsp70*-reporter activity.

7 Full blots used to create cropped figure panels are shown in Supplementary Figure 6.

8

9 **Figure 4: Impact of RD phosphorylation on HSP90 inhibitor effect on HSF1 activity and**  
10 **mobility shift in SDS-PAGE, and on HSF1 interaction with HSP90**

11 A. Schema of WT and dPRD FLAG-HSF1 constructs depicting RD phosphorylation sites  
12 mutated to alanine in dPRD-HSF1.

13 B. The N-terminal HSP90 inhibitor 17AAG enhances transcriptional activity of dPRD HSF1.  
14 HEK293 cells were transfected with *hsp70*-reporter construct and HSF1 C-terminal truncation  
15 constructs, treated with DMSO or 17AAG for 1 hour, heat shocked at 42°C for 30 minutes and  
16 allowed to recover for 4 hours before harvesting. This experiment was repeated three times and  
17 values represent mean +/- S.D.

18 C. N-terminal HSP90 inhibitors induce a mobility shift in dPRD HSF1 similarly to that seen with  
19 WT-HSF1. HEK293 cells were transfected with WT or dPRD HSF1, treated with the three N-  
20 terminal HSP90 inhibitors as shown, and harvested and HSF1 was analyzed by WB.

21 Full blots used to create cropped figure panels are shown in Supplementary Figure 6.

22

23 **Figure 5: HSP90 inhibition increases duration, but not extent, of HSF1 binding to the**  
24 ***hsp70* promoter and enhances HSF1 transcriptional activity in response to heat shock**

25 A. Chromatin immunoprecipitation using HSF1 antibody followed by PCR amplification of the  
26 *hsp70* promoter sequence (top, representative DNA gel; bottom, graphical display of band optical  
27 density data from 3 independent experiments +/- S.D.). HEK293 cells were either subjected to  
28 heat shock (42°C/30 minutes), treated with 17AAG, or both. The 17AAG groups were pre-  
29 exposed to the HSP90 inhibitor (10 µM, 1 hour) prior to heat shock. Samples were then put back  
30 in a 37°C incubator to recover for the indicated times. Values for the 'no drug, no HS' control

1 (first lane) were set to 1, and remaining values are expressed as fold above or below this baseline  
2 value. This experiment was repeated three times and values represent mean +/- S.D. A two-way  
3 ANOVA was used to analyze the samples for statistically significant differences compared to  
4 other samples at a given time. Significant difference compared to 'no drug, no HS' is indicated  
5 by asterisks (\*\*\*) indicates  $p < 0.001$ , \*\* indicates  $p < 0.01$ , and \* indicates  $p < 0.05$ ); '17AAG + HS'  
6 is also significantly lower than '17AAG' alone at 6hr (## -  $p < 0.01$ ) and significantly higher than  
7 'HS' alone at 2 and 4hr (+++ indicates  $p < 0.001$ , + indicates  $p < 0.05$ ).

8 B. Endogenous HSP70 mRNA was quantified by RT-qPCR in HEK293 cells subjected to heat  
9 shock alone, 17AAG alone, or heat shock after pre-exposure to 17AAG, using identical  
10 experimental conditions as in panel A. This experiment was performed in triplicate and values  
11 represent mean +/- S.D. A two-way ANOVA was used to analyze for statistically significant  
12 differences. Notably, there was a statistically significant difference between '17AAG alone' and  
13 '17AAG + HS' samples at 4 and 6 hours (\*\*\*) indicates  $p < 0.001$  and \*\*\*\* indicates  $p < 0.0001$ ).

14





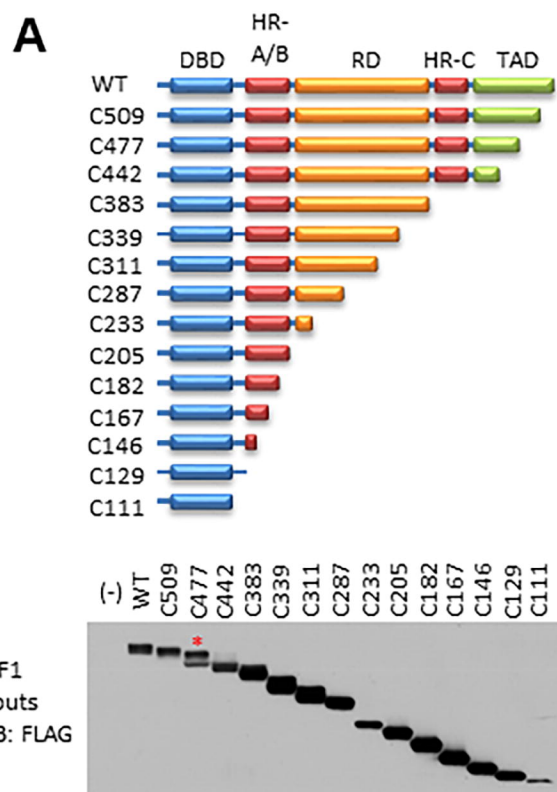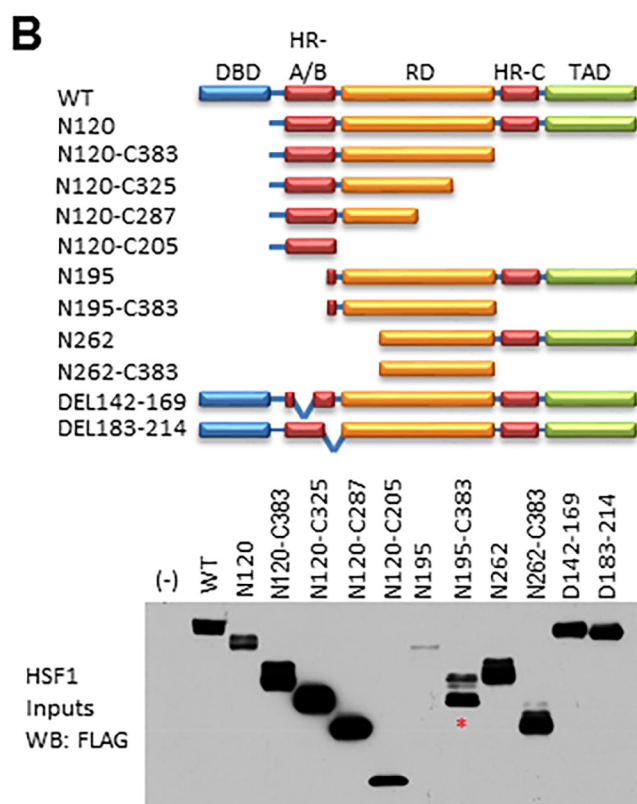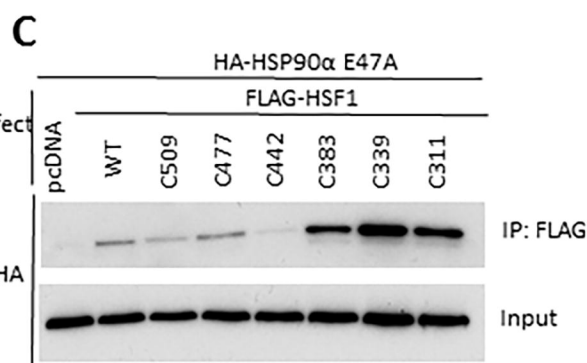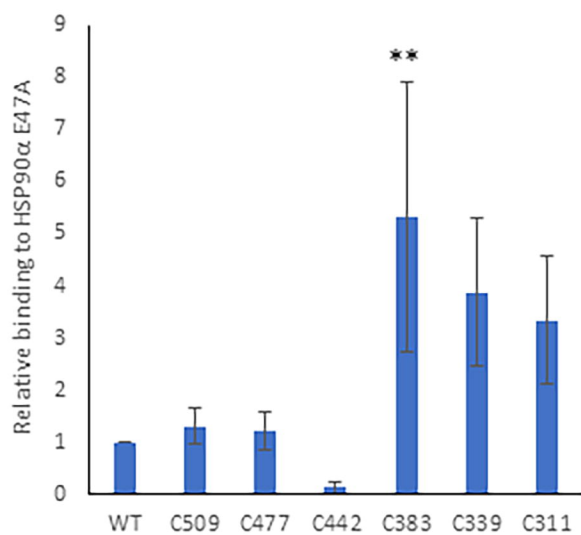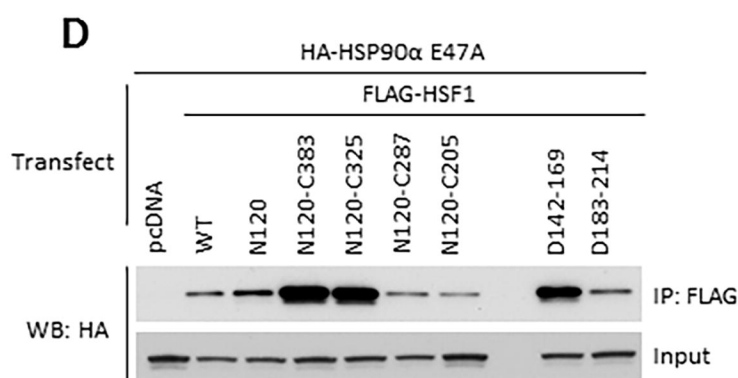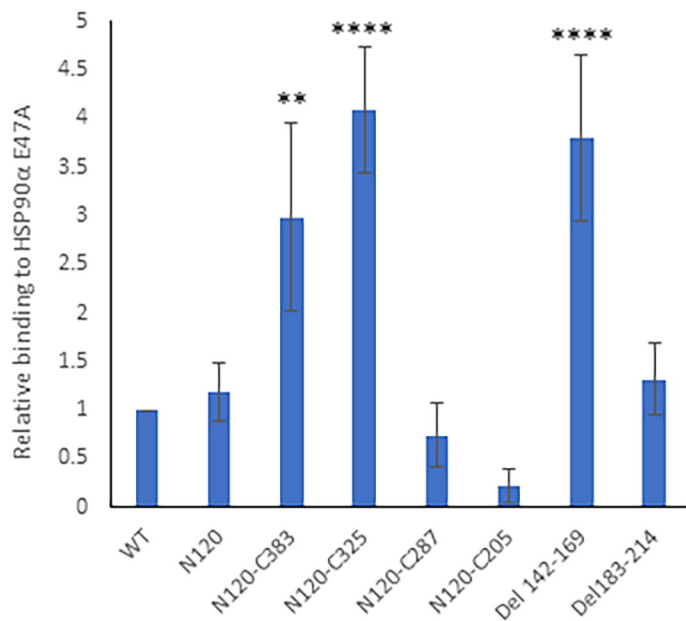

**A**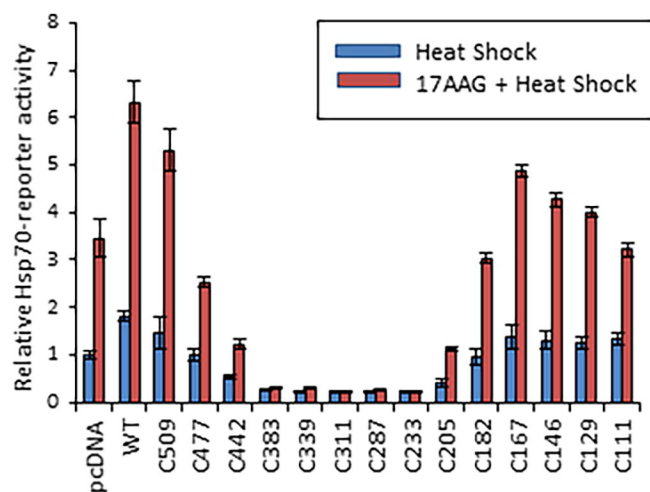**C**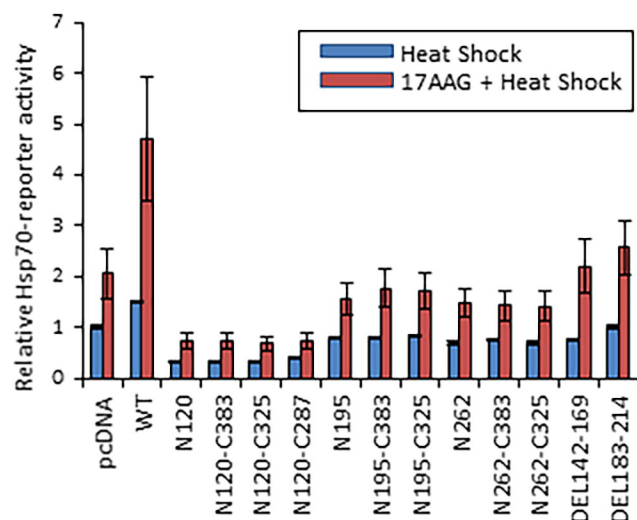**B**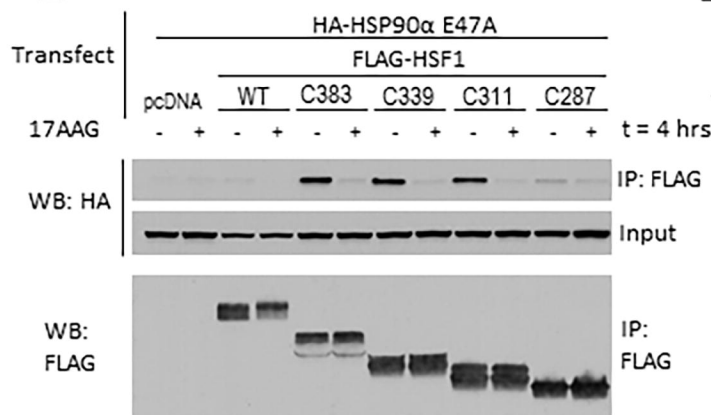**D**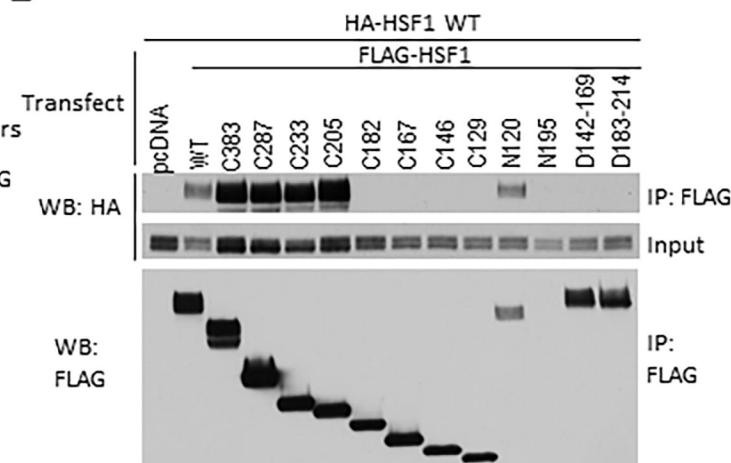**E**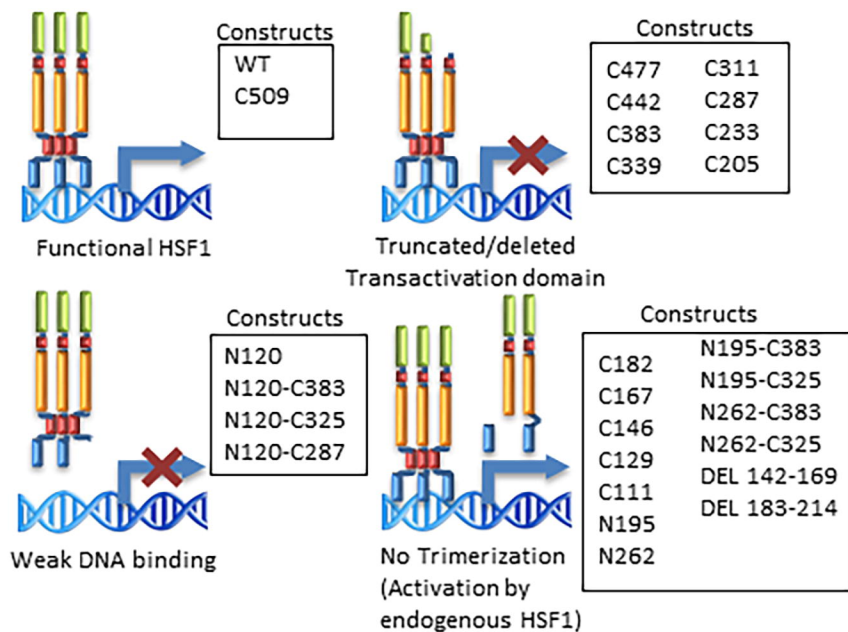

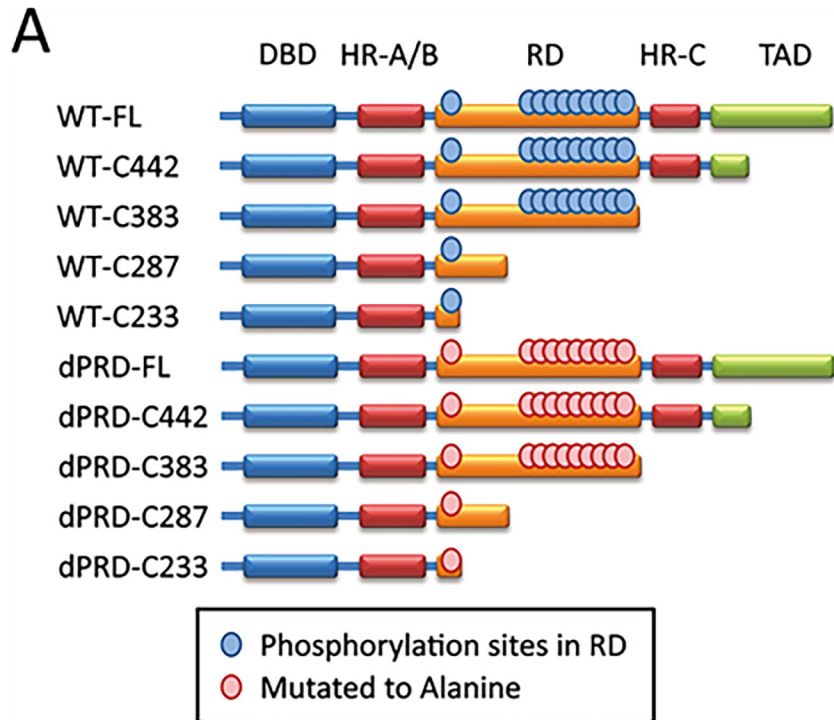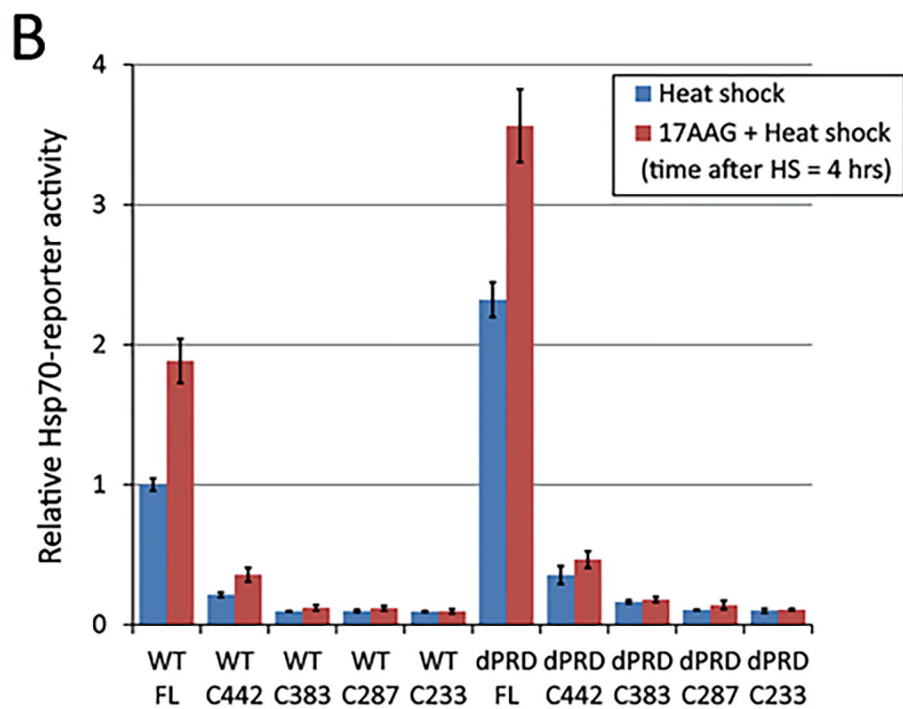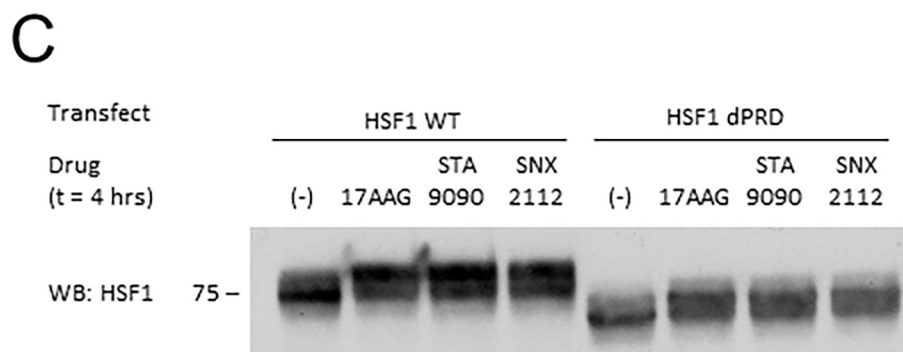

**A**

17AAG pretreatment (1hr)

HS (30min)

Time after HS (hr)

| HS (30min)         | -          | + | + | + | + | - | - | - | - | + | + | + | + | Mock |
|--------------------|------------|---|---|---|---|---|---|---|---|---|---|---|---|------|
| Time after HS (hr) | 0          | 0 | 2 | 4 | 6 | 0 | 2 | 4 | 6 | 0 | 2 | 4 | 6 | IP   |
|                    | ChIP: HSF1 |   |   |   |   |   |   |   |   |   |   |   |   |      |
|                    | Input      |   |   |   |   |   |   |   |   |   |   |   |   |      |

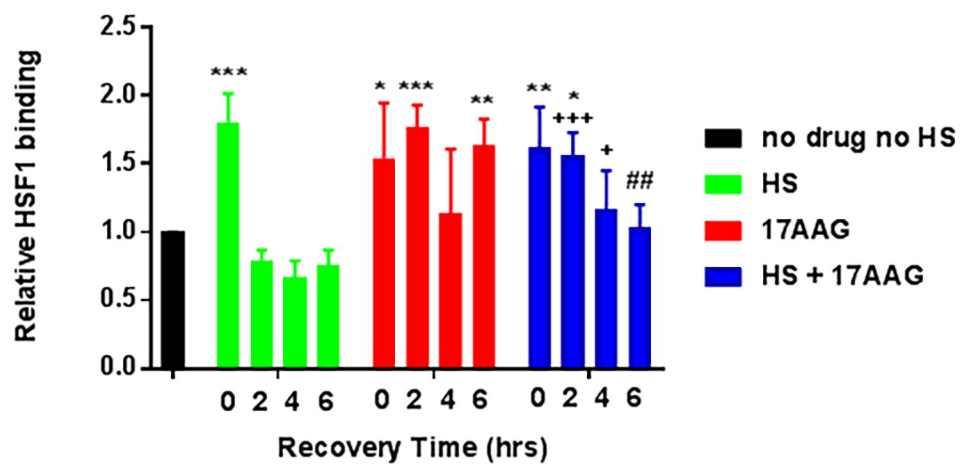**B**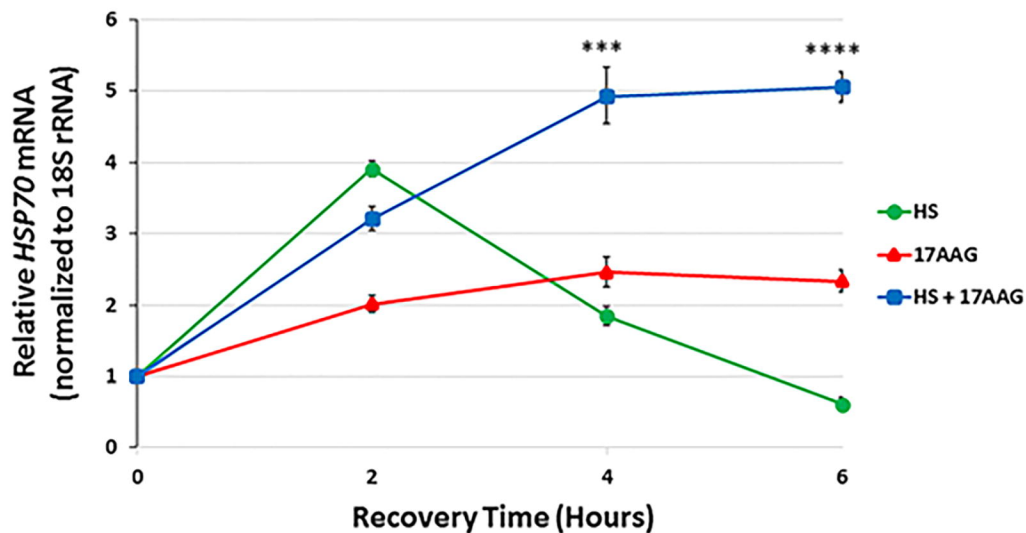

Source: https://www.biorxiv.org/content/10.1101/207001v2.full.pdf
